# Supplementary material
Source: PubMed Central journal article supplement (PMC3912541)

**Enhanced nicotine metabolism in HIV-1-positive smokers compared to HIV-negative smokers: Simultaneous determination of nicotine and its four metabolites in their plasma using a simple and sensitive ESI-LC-MS/MS technique**

Ravinder Earla, Anusha Ande, Carole McArthur, Anil Kumar, Santosh Kumar

Division of Pharmacology and Toxicology, School of Pharmacy, University of Missouri-Kansas City, Kansas City, MO, 64108 (R.E., A.A., A.K., S.K.)

Department of Oral and Craniofacial Science, School of Dentistry, University of Missouri-Kansas City, Kansas City, MO, 64108 (C.M.)

**Running title:** Nicotine metabolism in HIV-1 positive and negative smokers

**Corresponding author**

Santosh Kumar, School of Pharmacy, University of Missouri-Kansas City, 2464 Charlotte Street, Kansas City, MO 64108, Tel: 816-235-5494,

Fax: 816-235-1776, Email: [Kumarsa@umkc.edu](mailto:Kumarsa@umkc.edu)

**Table 1.** Electrospray Ionization Mass Spectrometry (ESI-MS) with a proton adducts  $[M+H]^+$  based on *mass* to *charge* ratio (*m/z*) parameters for nicotine, nornicotine, cotinine, norcotinine, and *trans* 3'-hydroxycotinine.

| Analyte                          | Precursor ion | Product ions                             | DP(V) | EP(V) | CEP(V) | MRM transition | CE (V) |
|----------------------------------|---------------|------------------------------------------|-------|-------|--------|----------------|--------|
|                                  | Q1(MS1)       | Q2(MS2)                                  | (MS1) | (MS1) | (MS1)  | [Q1 → Q3]      |        |
| Nicotine                         | 163.3         | 84.1, 106.0, <b>117.1</b> , 130.3, 132.4 | 36.0  | 5.5   | 10.0   | 163.3→117.1    | 33.0   |
| Nornicotine                      | 149.5         | 80.1, 117.1, 130.1, <b>132.3</b>         | 36.0  | 5.0   | 11.0   | 149.5→132.3    | 17.1   |
| Nicotine-d4(IS)                  | 167.3         | 84.3, 110.5, <b>121.4</b> , 134.2, 136.4 | 36.0  | 7.0   | 9.5    | 167.3→121.4    | 35.0   |
| Cotinine                         | 177.5         | <b>80.3</b> , 98.1, 146.2                | 46.0  | 7.0   | 12.0   | 177.5→80.3     | 23.0   |
| Norcotinine                      | 163.4         | <b>80.3</b> , 84.1, 135.2, 146.3         | 51.0  | 6.5   | 10.0   | 163.4→80.3     | 25.0   |
| <i>Trans</i> 3'-hydroxy cotinine | 193.2         | <b>80.1</b> , 134.3, 149.2               | 51.0  | 5.5   | 11.5   | 193.2→80.1     | 25.0   |
| Cotinine-d3(IS)                  | 180.3         | 80.3, <b>101.2</b> , 118.1, 146.0        | 46.0  | 7.5   | 12.0   | 180.3→101.2    | 29.0   |

**MS**- mass spectrometry; **m/z**-mass-to- charge ratio; **DP**- declustering potential; **CE**- collision energy; **CEP**: Cell exit potential; **CAD**-collisionally activated dissociation gas : 3.0 psi; **MRM**- multiple monitoring reactions; **Dwell time**: 500 ms; **Source gas (GS1)** : 30.0 psi; **Source gas (GS2)**: 30.0 psi; **Source temperature (TEM)** : 400<sup>0</sup>C ; **Ion spray voltage (IS)** : 5500 Volts; **Interface heater**: on and **Analytical total run time** : 4.0 min;

**Table-2.** LC-MS/MS system suitability test for nicotine, nornicotine, cotinine, norcotinine and *trans* 3'-hydroxycotinine with internal standards, nicotine-d4, and cotinine-d3 were used.

| <i>MRM peak area counts(1.0 µg/mL)</i>  |                              |                                    | <i>MRM peak area counts(1.0 µg/mL)</i>  |                              |                                         |
|-----------------------------------------|------------------------------|------------------------------------|-----------------------------------------|------------------------------|-----------------------------------------|
| <b>Nicotine</b>                         | <b>Nicotine-<br/>d4 (IS)</b> | <b>Area ratio<br/>(Analyte/IS)</b> | <b>Nornicotine</b>                      | <b>Nicotine-<br/>d4 (IS)</b> | <b>Area ratio<br/>(Analyte/IS)</b>      |
| 1141682                                 | 1897707                      | 0.5911                             | 2185983                                 | 1897707                      | 1.1519                                  |
| 1149019                                 | 1931564                      | 0.5949                             | 2142384                                 | 1931564                      | 1.1091                                  |
| 1171239                                 | 1943119                      | 0.6028                             | 2162761                                 | 1943119                      | 1.1130                                  |
| 1148919                                 | 1939139                      | 0.5925                             | 2173457                                 | 1939139                      | 1.0980                                  |
| 1161239                                 | 1943519                      | 0.5975                             | 2152861                                 | 1943519                      | 1.1077                                  |
| 1184409                                 | 1979449                      | 0.5984                             | 2153761                                 | 1979449                      | 1.0881                                  |
| <b>Mean</b>                             |                              | <b>0.596198</b>                    |                                         |                              | <b>1.11130</b>                          |
| <b>SD</b>                               |                              | <b>0.0042781</b>                   |                                         |                              | <b>0.021844</b>                         |
| <b>%CV</b>                              |                              | <b>0.72</b>                        |                                         |                              | <b>1.97</b>                             |
| <i>MRM peak area counts (1.0 µg/mL)</i> |                              |                                    | <i>MRM peak area counts (1.0 µg/mL)</i> |                              | <i>MRM peak area counts (1.0 µg/mL)</i> |

| <b>Cotinine</b> | <b>Cotinine<br/>-d3 (IS)</b> | <b>Area ratio<br/>(Analyte/IS)</b> | <b>Norcotinine</b> | <b>Cotinine<br/>-d3 (IS)</b> | <b>Area ratio<br/>(Analyte/IS)</b> | <b><i>Trans 3'</i>-<br/>hydroxy<br/>cotinine</b> | <b>Cotinine-<br/>d3 (IS)</b> | <b>Area ratio<br/>(Analyte/IS)</b> |
|-----------------|------------------------------|------------------------------------|--------------------|------------------------------|------------------------------------|--------------------------------------------------|------------------------------|------------------------------------|
| 2999425         | 2273971                      | 1.3190                             | 3771038            | 2273971                      | 1.6583                             | 3479011                                          | 2273971                      | 1.5299                             |
| 3060224         | 2316229                      | 1.3212                             | 3804754            | 2316229                      | 1.6427                             | 3549332                                          | 2316229                      | 1.5324                             |
| 3134471         | 2313156                      | 1.3551                             | 3815535            | 2313156                      | 1.6495                             | 3589533                                          | 2313156                      | 1.5518                             |
| 3033583         | 2290737                      | 1.3243                             | 3781464            | 2290737                      | 1.6508                             | 3485113                                          | 2290737                      | 1.5214                             |
| 3100583         | 2390728                      | 1.3243                             | 3790161            | 2390728                      | 1.6508                             | 3525243                                          | 2390728                      | 1.5214                             |
| 3103501         | 2298747                      | 1.3243                             | 3879214            | 2298747                      | 1.6508                             | 3486313                                          | 2298747                      | 1.5214                             |
| <b>Mean</b>     |                              | <b>1.32803</b>                     |                    |                              | <b>1.65048</b>                     |                                                  |                              | <b>1.52971</b>                     |
| <b>SD</b>       |                              | <b>0.013436</b>                    |                    |                              | <b>0.004958</b>                    |                                                  |                              | <b>0.011852</b>                    |
| <b>%CV</b>      |                              | <b>1.01</b>                        |                    |                              | <b>0.31</b>                        |                                                  |                              | <b>0.77</b>                        |

**CV-** Coefficient of variation ((SD/mean) X100; **MRM-** Multiple reactions monitoring

Figure 1: Extracted blank plasma for nicotine, cotinine, trans-3-hydroxycotinine, nornicotine and norcotinine.

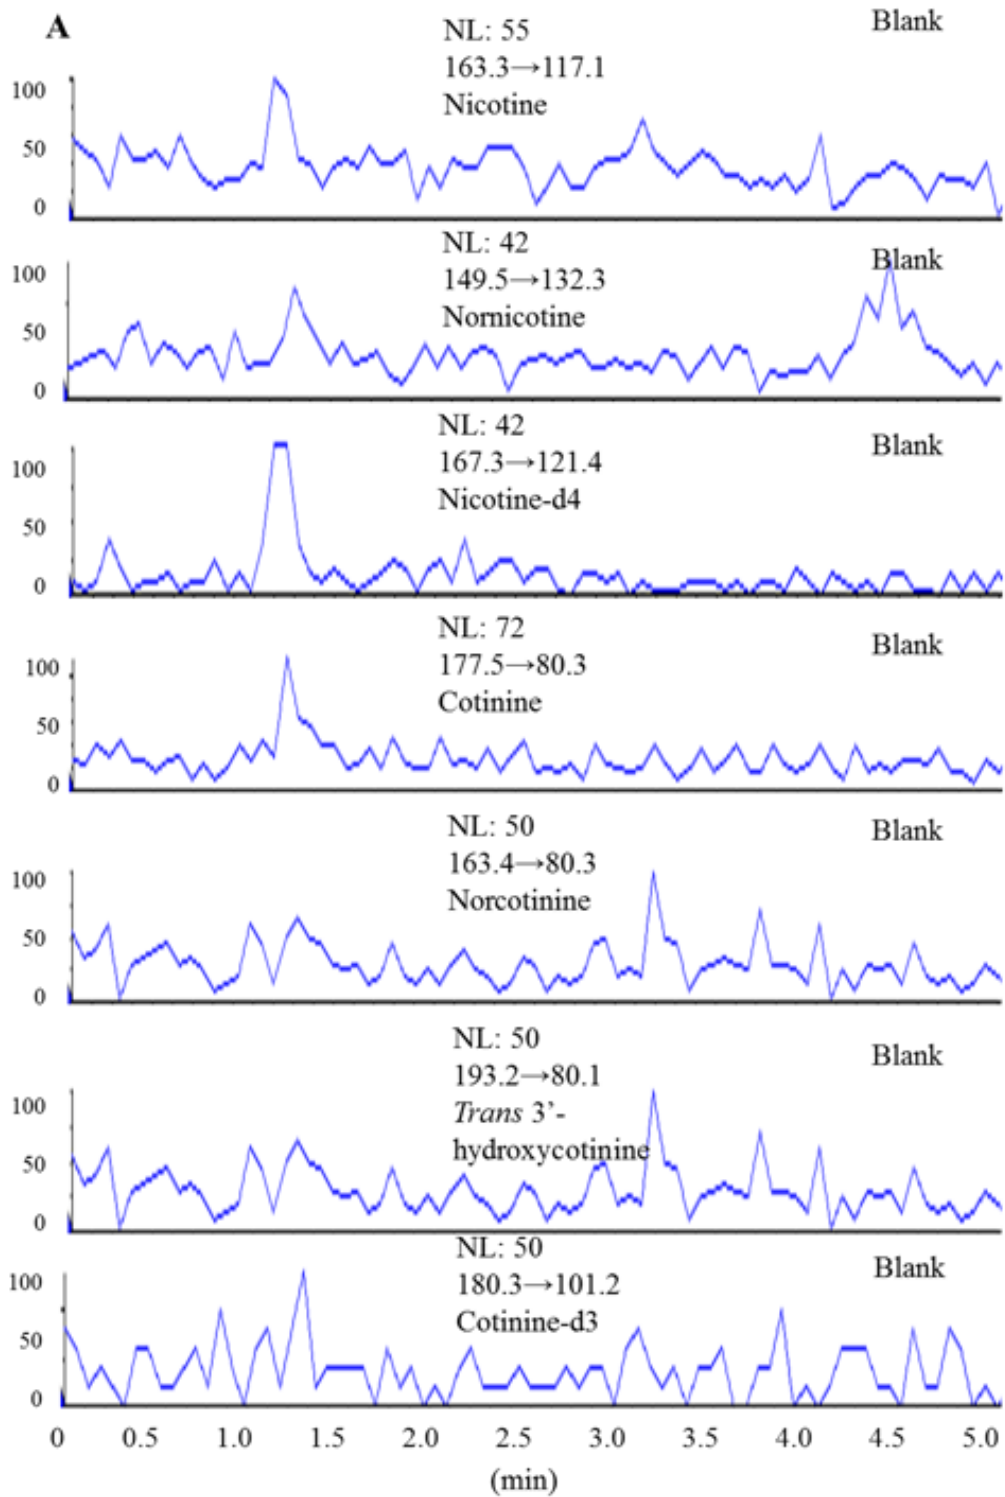

Figure 2: Calibration curve standards and linear regression lines for analysis of nicotine and its metabolites in non-smokers plasma that were used for calculating their concentrations in the plasma of HIV-1-positive, and HIV-negative smokers.

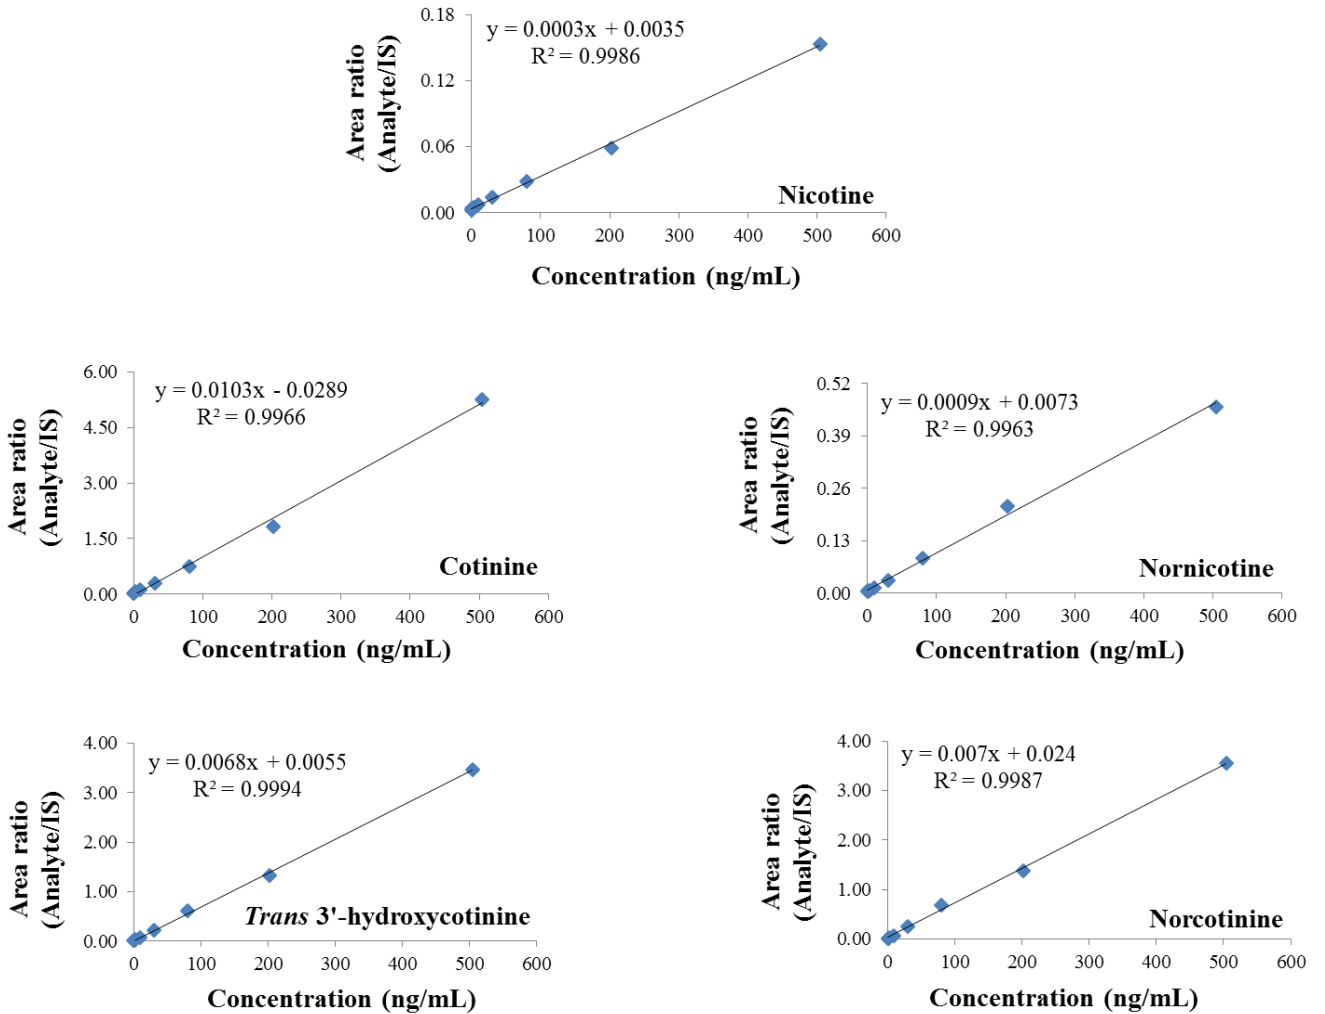

Supplement: supp_113.055186_Supplemental_data_55186.pdf [file supp_113.055186_Supplemental_data_55186.pdf]
